## CORRECTION

# Correction: Caesarean section and severe upper and lower respiratory tract infections during infancy: Evidence from two UK cohorts

The *PLOS ONE* staff

## Notice of republication

An incorrect version of the running short title was published in error. The publisher apologizes for the error. This article was republished on March 1, 2021, to correct for this error. Please download this article again to view the correct version.

## Reference

1. Alterman N, Kurinczuk JJ, Quigley MA (2021) Caesarean section and severe upper and lower respiratory tract infections during infancy: Evidence from two UK cohorts. *PLoS ONE* 16(2): e0246832. <https://doi.org/10.1371/journal.pone.0246832> PMID: 33592033

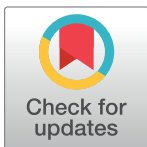

## OPEN ACCESS

**Citation:** The *PLOS ONE* staff (2021) Correction: Caesarean section and severe upper and lower respiratory tract infections during infancy: Evidence from two UK cohorts. *PLoS ONE* 16(3): e0248548. <https://doi.org/10.1371/journal.pone.0248548>

**Published:** March 16, 2021

**Copyright:** © 2021 The PLOS ONE staff. This is an open access article distributed under the terms of the [Creative Commons Attribution License](https://creativecommons.org/licenses/by/4.0/), which permits unrestricted use, distribution, and reproduction in any medium, provided the original author and source are credited.
